# Supplementary material for: Recent developments in the bio-mediated synthesis of CoFe2O4 nanoparticles using plant extracts for environmental and biomedical applications
Source: Royal Society of Chemistry journal article supplement (doi:10.1039/d4na00604f), 2024-01-01
Supplement: d4na00604f1.pdf [file d4na00604f1.pdf]

## Supplementary Material

### Recent developments in the bio-mediated synthesis of $\text{CoFe}_2\text{O}_4$ nanoparticles using plant extracts for environmental and biomedical applications

Giang Thanh Tran,<sup>1,2</sup> Luan Minh Nguyen,<sup>3,4</sup> Thuy Thi Thanh Nguyen,<sup>2</sup> Dai Hai

Nguyen,<sup>3</sup> Thuan Van Tran<sup>1,\*</sup>

<sup>1</sup> Institute of Applied Technology and Sustainable Development, Nguyen Tat Thanh University,  
298-300A Nguyen Tat Thanh, District 4, Ho Chi Minh City 755414, Vietnam.

<sup>2</sup> Nong Lam University Ho Chi Minh City, Ho Chi Minh City 700000, Vietnam.

<sup>3</sup> Institute of Chemical Technology, Vietnam Academy of Science and Technology, 1A TL29,  
District 12, Ho Chi Minh City, 700000, Viet Nam.

<sup>4</sup> Graduate University of Science and Technology, Vietnam Academy of Science and  
Technology, Hanoi, 100000, Viet Nam.

#### Correspondence

\* To whom correspondence should be addressed:

Thuan Van Tran (Email: [tranuv@gmail.com](mailto:tranuv@gmail.com); [tranvt@ntt.edu.vn](mailto:tranvt@ntt.edu.vn))

Institute of Applied Technology and Sustainable Development, Nguyen Tat Thanh University,  
298-300A Nguyen Tat Thanh, District 4, Ho Chi Minh City 755414, Vietnam.

Tel: (+84)-028-3941-1211, Fax: (+84)-028-39-404-759.

**Table S1.** Green synthesis of CoFe<sub>2</sub>O<sub>4</sub> nanoparticles using plant extracts and several physicochemical properties (particle size, morphology, bandgap, surface chemistry, magnetization) of green CoFe<sub>2</sub>O<sub>4</sub> nanoparticles.

| Plant species                 | Plant tissues | Heating treatment | Calcination time | Surface area (m <sup>2</sup> /g) | Particles size (nm) | Morphology | Band gap (eV) | Magnetization (emu/g) | Ref.         |
|-------------------------------|---------------|-------------------|------------------|----------------------------------|---------------------|------------|---------------|-----------------------|--------------|
| <i>Okra (A. esculentus)</i>   | Fruit         | 1000 °C           | 3 h              | -                                | 55                  | Spherical  | 1.96          | 65.31                 | <sup>1</sup> |
| <i>Okra (A. esculentus)</i>   | Fruit         | Microwave heating | 15 min           | -                                | 47                  | Spherical  | 2.09          | 65                    | <sup>1</sup> |
| <i>Olea europaea</i>          | Leaf          | 700 °C            | 3 h              | -                                | 15–30               | Spherical  | -             | 58.55                 | <sup>2</sup> |
| <i>Hibiscus rosa-sinensis</i> | Flower        | 800°C             | 1 h              | -                                | 18.8                | -          | -             | 37.19                 | <sup>3</sup> |
| <i>Verjuice</i>               | Fruits        | 600-800 °C        | 3 h              | -                                | 8-42                | Polyhedral | -             | 81.2                  | <sup>4</sup> |
| <i>Hibiscus rosa-sinensis</i> | Flower        | 1000 °C           | 3 h              | -                                | 56                  | Spherical  | 2.06          | 56.43                 | <sup>5</sup> |
| <i>Hibiscus rosa-sinensis</i> | Flower        | Microwave heating | 15 min           | -                                | 43                  | Spherical  | 1.87          | 55.29                 | <sup>5</sup> |
| <i>Hibiscus rosa-sinensis</i> | Leaf          | 300 °C            | 2 h              | -                                | -                   | Spherical  | 2             | 104.2                 | <sup>6</sup> |

*sinensis*  
*fresh*

|                               |                 |                   |        |   |       |           |      |       |    |
|-------------------------------|-----------------|-------------------|--------|---|-------|-----------|------|-------|----|
| <i>Syzygium aromaticum</i>    | Leaf            | 600 °C            | 2 h    | - | 75    | Bipyramid | -    | -     | 7  |
| <i>Aloe vera</i>              | Leaf            | 400 °C            | 3 h    | - | 50-65 | Bud-like  | -    | 72.23 | 8  |
| <i>Opuntia dilenii haw</i>    | -               | 1000 °C           | 3 h    | - | 59    | Spherical | 2.01 | 68.76 | 9  |
| <i>Opuntia dilenii haw</i>    | -               | Microwave heating | 15 min | - | 48    | -         | 1.93 | 77.29 | 9  |
| <i>Hibiscus rosa-sinensis</i> | Leaf and flower | 800 °C            | 2 h    | - | 23.85 | Spherical | -    | -     | 10 |
| <i>Tamarindus indica</i>      | Fruit           | 500 °C            | 1 h    | - | 13    | -         | -    | 52.12 | 11 |
| <i>Aloe Vera</i>              | Leaf            | 220 °C            | 12 h   | - | 8     | Spherical | -    | 33.43 | 12 |
| <i>Moringa Oleifera</i>       | Leaf            | 600 °C            | 5.5 h  | - | 6.4   | Spherical | 3.5  | 37.6  | 13 |
| <i>Ginger</i>                 | Root            | 800 °C            | 1 h    | - | 20–50 | Spherical | 1.44 | -     | 14 |
| <i>Cardamom</i>               | Seeds           | 800 °C            | 1 h    | - | 20–50 | Spherical | 1.36 | -     | 14 |

|                                                 |        |                      |        |       |        |                    |               |               |    |
|-------------------------------------------------|--------|----------------------|--------|-------|--------|--------------------|---------------|---------------|----|
| <i>Alhagi maurorum</i><br>( <i>camelthorn</i> ) | -      | 600-800 °C           | -      | -     | 27-58  | Bipyramid          | 3.78-<br>4.24 | 66.5-<br>81.1 | 15 |
| <i>Lemon</i>                                    | Fruits | 700 °C               | 3 h    | -     | 50-100 | Semi-<br>spherical | -             | 75.7          | 16 |
| <i>Okra (A. esculentus)</i>                     | Fruits | 600 °C               | 3 h    | -     | 32-58  | -                  | -             | 55.8          | 17 |
| <i>Aloe vera</i>                                | Leaf   | 500 °C               | 2 h    | 72.1  | 27     | Flake-like         | 2.1           | 25.46         | 18 |
| <i>Aloe vera</i>                                | Leaf   | Microwave<br>heating | 10 min | 93.5  | 15     | Spherical          | 2.1           | 77.62         | 18 |
| <i>Carissa carandas</i>                         | Stem   | 500 °C               | 2 h    | 136.0 | 35     | Spherical          | 4.5           | -             | 19 |
| <i>Erythrina variegata</i>                      | Leaf   | 900 °C               | 3 h    | -     | 30-38  | Cubic              | 1.86          | -             | 20 |
| <i>Bean Pods</i>                                | Fruit  | 180 °C               | 6 h    | -     | 1.8    | Spherical          | -             | -             | 21 |
| <i>Pedaliium murex</i>                          | Leaf   | Microwave<br>heating | 12 min | 157.7 | 42     | Spherical          | 1.76          | 84.1          | 22 |

---

**Table S2.** Microbial performance of green CoFe<sub>2</sub>O<sub>4</sub> nanoparticles.

| Materials                        | Plant                         | Applications  | Findings                                                                                                                                                                                                                                                                                                                                                                                                                                                | Ref. |
|----------------------------------|-------------------------------|---------------|---------------------------------------------------------------------------------------------------------------------------------------------------------------------------------------------------------------------------------------------------------------------------------------------------------------------------------------------------------------------------------------------------------------------------------------------------------|------|
| CoFe <sub>2</sub> O <sub>4</sub> | <i>Okra extract</i>           | Antimicrobial | Zone of inhibition: <i>Staphylococcus aureus</i> (14 mm), <i>Micrococcus luteus</i> (8 mm), <i>Enterobacter aerogenes</i> (9 mm), <i>Yersinia enterocolitica</i> (16 mm), <i>Aspergillus aureus</i> (9 mm), <i>Candida Krusei</i> (15 mm)                                                                                                                                                                                                               | 1    |
| CoFe <sub>2</sub> O <sub>4</sub> | <i>Hibiscus rosa-sinensis</i> | Antimicrobial | Zone of inhibition: <i>Escherichia coli</i> ATCC 8739 (8 mm), <i>Enterococcus faecalis</i> ATCC 29212 (10 mm), <i>Bacillus subtilis</i> ATCC 6633 (6 mm), <i>Candida albicans</i> ATCC 26790 (6 mm)<br><br>Minimum inhibitory concentration:<br><i>Escherichia coli</i> ATCC 8739 (62.0 µg/ml),<br><i>Enterococcus faecalis</i> ATCC 29212 (62.0 µg/ml), <i>Bacillus subtilis</i> ATCC 6633 (62.0 µg/ml), <i>Candida albicans</i> ATCC 26790 (62 µg/ml) | 3    |
| CoFe <sub>2</sub> O <sub>4</sub> | <i>Hibiscus rosa-sinensis</i> | Antimicrobial | Zone of inhibition: <i>Staphylococcus aureus</i> (9 mm), <i>Escherichia coli</i> (12 mm)                                                                                                                                                                                                                                                                                                                                                                | 6    |

|                                          |                                   |               |                                                                                                                                                                                                                                                                                                                                                                                                      |    |
|------------------------------------------|-----------------------------------|---------------|------------------------------------------------------------------------------------------------------------------------------------------------------------------------------------------------------------------------------------------------------------------------------------------------------------------------------------------------------------------------------------------------------|----|
| CoFe <sub>2</sub> O <sub>4</sub> @<br>Ag | <i>Carissa<br/>carandas</i>       | Antimicrobial | Zone of inhibition: <i>Bacillus subtilis</i> (24 mm),<br><i>Staphylococcus aureus</i> (17 mm),<br><i>Pseudomonas aeruginosa</i> (20 mm),<br><i>Escherichia coli</i> (19 mm)                                                                                                                                                                                                                          | 19 |
| CoFe <sub>2</sub> O <sub>4</sub> @<br>Ag | <i>Piper<br/>chaudocanu<br/>m</i> | Antimicrobial | Zone of inhibition: <i>Pseudomonas aeruginosa</i><br>(18 mm), <i>Escherichia coli</i> (20 mm),<br><i>Staphylococcus aureus</i> (19 mm)                                                                                                                                                                                                                                                               | 23 |
| CoFe <sub>2</sub> O <sub>4</sub> @<br>Ag | <i>Moringa<br/>oleifera</i>       | Antimicrobial | Zone of inhibition: <i>Staphylococcus aureus</i><br>(15 mm), <i>Pseudomonas aeruginosa</i> (17 mm),<br><i>Bacillus subtilis</i> (22 mm), <i>Escherichia coli</i><br>(22 mm)<br><br>Minimum inhibitory concentration:<br><i>Staphylococcus aureus</i> (25.5 µg/mL),<br><i>Pseudomonas aeruginosa</i> (28.1 µg/mL),<br><i>Bacillus subtilis</i> (16.2 µg/mL), <i>Escherichia<br/>coli</i> (20.5 µg/mL) | 24 |
| CoFe <sub>2</sub> O <sub>4</sub>         | <i>Eucalyptus<br/>globulu</i>     | Antimicrobial | Zone of inhibition: <i>Staphylococcus aureus</i><br>(8.5 mm), <i>Pseudomonas aeruginosa</i> (8 mm),<br><i>Escherichia coli</i> (7.5 mm), <i>Candida albicans</i>                                                                                                                                                                                                                                     | 25 |

(8.5 mm)

|                                               |                            |               |                                                                                                                                                                                                                                                                                                                                                                                                |    |
|-----------------------------------------------|----------------------------|---------------|------------------------------------------------------------------------------------------------------------------------------------------------------------------------------------------------------------------------------------------------------------------------------------------------------------------------------------------------------------------------------------------------|----|
| Graphite@C<br>oFe <sub>2</sub> O <sub>4</sub> | <i>Rutin extract</i>       | Antimicrobial | Minimum inhibitory concentration:<br><i>Staphylococcus aureus</i> (6,800 µg/mL),<br><i>Escherichia coli</i> : 6,900 µg/mL<br><br>Minimum bactericidal concentration:<br><i>Staphylococcus aureus</i> (9,400 µg/mL),<br><i>Escherichia coli</i> (9,100 µg/mL)                                                                                                                                   | 26 |
| CoFe <sub>2</sub> O <sub>4</sub>              | <i>Aloe vera</i>           | Antimicrobial | Minimum inhibitory concentration:<br>multidrug-resistant <i>Pseudomonas aeruginosa</i><br>(250 µg/mL), <i>Pseudomonas aeruginosa</i> (500<br>µg/mL), <i>Escherichia coli</i> (500 µg/mL),<br><i>Staphylococcus aureus</i> (500 µg/mL),<br>Methicillin-resistant <i>Staphylococcus aureus</i><br>(500 µg/mL), <i>Candida albicans</i> (750<br>µg/mL), <i>Candida parapsilosis</i> (1,000 µg/mL) | 27 |
| CoFe <sub>2</sub> O <sub>4</sub>              | <i>Sesamum<br/>indicum</i> | Antimicrobial | Minimum inhibitory concentration:<br><i>Enterococcus faecalis</i> (250 µg/mL),<br><i>Staphylococcus aureus</i> (1,000 µg/mL),<br><i>Escherichia coli</i> (1,000 µg/mL),<br><i>Pseudomonas aeruginosa</i> (125 µg/mL),<br><i>Candida albicans</i> (> 1,000 µg/mL)                                                                                                                               | 28 |

|                                          |                           |             |                                                                                                                                |    |
|------------------------------------------|---------------------------|-------------|--------------------------------------------------------------------------------------------------------------------------------|----|
| CoFe <sub>2</sub> O <sub>4</sub>         | <i>Sesamum indicum</i>    | Anticancer  | Cell viability of HCT-8: 14% (1000 µg/mL)                                                                                      | 28 |
| CoFe <sub>2</sub> O <sub>4</sub>         | <i>Torajabin</i>          | Anticancer  | Half-maximal inhibitory concentration:<br>CaCo2 (1095 µg/mL), MCF-7 (1811 µg/mL),<br>mouse embryo fibroblast cell (2502 µg/mL) | 15 |
| CoFe <sub>2</sub> O <sub>4</sub> @<br>Ag | <i>Piper chaudiocanum</i> | Anticancer  | Half-maximal inhibitory concentration:<br>HepG2 (68.9 µg/mL)                                                                   | 23 |
| CoFe <sub>2</sub> O <sub>4</sub> @<br>Ag | <i>Carissa carandas</i>   | Anticancer  | Half-maximal inhibitory concentration:<br>MCF-7 (60 µg/mL)                                                                     | 19 |
| CoFe <sub>2</sub> O <sub>4</sub> @<br>Ag | <i>Moringa oleifera</i>   | Antioxidant | Inhibition of 69% DPPH (0.1%) by 1,000 µg/mL                                                                                   | 24 |

---

\*Note: DPPH, 2,2-diphenyl-1-picrylhydrazyl.



**Table S3.** Performance of green CoFe<sub>2</sub>O<sub>4</sub> nanoparticles for removal of pollutants.

| Materials                                              | Reducing agent                        | Pollutant      | Pollutant concentration (mg/L) | Catalyst dosage (g/L) | Treatment method | Treatment efficiency | Ref. |
|--------------------------------------------------------|---------------------------------------|----------------|--------------------------------|-----------------------|------------------|----------------------|------|
| CoFe <sub>2</sub> O <sub>4</sub>                       | <i>Erythrina variegata</i> extract    | Crystal violet | 25                             | 0.15                  | Photodegradation | 85.18%               | 20   |
| CoFe <sub>2</sub> O <sub>4</sub>                       | <i>Erythrina variegata</i> extract    | Congo red      | 25                             | 0.15                  | Photodegradation | 79.58%               | 20   |
| CoFe <sub>2</sub> O <sub>4</sub>                       | <i>Carissa carandas</i> extract       | Rhodamine B    | 30                             | 0.01                  | Photodegradation | 77.83% in 35 min     | 19   |
| CoFe <sub>2</sub> O <sub>4</sub> @Ag                   | <i>Carissa carandas</i> extract       | Rhodamine B    | 30                             | 0.01                  | Photodegradation | 97.42% in 35 min     | 19   |
| CoFe <sub>2</sub> O <sub>4</sub>                       | <i>Torajabin</i> extract              | Acid orange 7  | 20                             | 1.0                   | Photodegradation | 92.1% in 120 min     | 15   |
| CoFe <sub>2</sub> O <sub>4</sub> @ZnO@CeO <sub>2</sub> | <i>Crataegus microphylla</i> extract  | Humic acid     | 250                            | 3.0                   | Photodegradation | 97.2% in 100 min     | 29   |
| CoFe <sub>2</sub> O <sub>4</sub>                       | <i>Hibiscus rosa-sinensis</i> extract | Methylene blue | 10                             | -                     | Photodegradation | 84.0% in 120 min     | 6    |

|                                                                      |                                              |                   |     |     |                          |                    |    |
|----------------------------------------------------------------------|----------------------------------------------|-------------------|-----|-----|--------------------------|--------------------|----|
| CoFe <sub>2</sub> O <sub>4</sub> /Ti<br>O <sub>2</sub>               | <i>Moringa<br/>oleifera</i><br>extract       | Methylene<br>blue | 7   | 1.0 | Photodegra<br>dation     | 98.7% in<br>20 min | 30 |
| CoFe <sub>2</sub> O <sub>4</sub> /Ti<br>O <sub>2</sub> /rGO          | <i>Pedaliium<br/>murex</i> extract           | Tetracyclin<br>e  | 20  | 0.3 | Sonophoto<br>degradation | 92.0% in<br>90 min | 22 |
| CoFe <sub>2</sub> O <sub>4</sub> /Ti<br>O <sub>2</sub> /rGO          | <i>Pedaliium<br/>murex</i> extract           | Ciprofloxa<br>cin | 10  | 0.3 | Sonophoto<br>degradation | 84.0% in<br>90 min | 22 |
| CoFe <sub>2</sub> O <sub>4</sub> @<br>Nb <sub>2</sub> O <sub>5</sub> | <i>Tangerine<br/>Peel</i> extract            | Paracetamo<br>l   | 20  | 0.5 | Photodegra<br>dation     | 97.5%              | 31 |
| CoFe <sub>2</sub> O <sub>4</sub>                                     | <i>Ginkgo biloba</i><br>extract              | Congo red         | 50  | 1.0 | Adsorption               | 45.7 mg/g          | 32 |
| Ag-<br>CoFe <sub>2</sub> O <sub>4</sub>                              | <i>Taxus<br/>wallichiana</i><br>leaf extract | Pb <sup>2+</sup>  | 100 | -   | Adsorption               | 33.0 mg/g          | 33 |
| CoFe <sub>2</sub> O <sub>4</sub>                                     | <i>Ginger</i> extract                        | Phenol red        | -   | 1.0 | Photodegra<br>dation     | 91.0%              | 14 |
| CoFe <sub>2</sub> O <sub>4</sub>                                     | <i>Cardamom</i><br>extract                   | Phenol red        | -   | 2.0 | Photodegra<br>dation     | 74.6%              | 14 |

---

## References

- 1 K. Kombaiah, J. J. Vijaya, L. J. Kennedy, M. Bououdina, R. J. Ramalingam and H. A. Al-Lohedan, *Mater. Chem. Phys.*, 2018, **204**, 410–419.
- 2 S. S. Banifatemi, F. Davar, B. Aghabarari, J. A. Segura, F. J. Alonso and S. M. Ghoreishi, *Ceram. Int.*, 2021, **47**, 19198–19204.
- 3 D. Gingasu, I. Mindru, L. Patron, J. M. Calderon-Moreno, O. C. Mocioiu, S. Preda, N. Stanica, S. Nita, N. Dobre, M. Popa, G. Gradisteanu and M. C. Chifiriuc, *J. Nanomater.*, 2016, **2016**, 1–12.
- 4 A. Kiani, F. Davar and M. Bazarganipour, *Ceram. Int.*, 2022, **48**, 34895–34906.
- 5 K. Kombaiah, J. J. Vijaya, L. J. Kennedy, M. Bououdina, R. J. Ramalingam and H. A. Al-Lohedan, *Ceram. Int.*, 2017, **43**, 7682–7689.
- 6 L. Velayutham, C. Parvathiraja, D. C. Anitha, K. Mahalakshmi, M. Jenila, F. A. Alasmay, A. S. Almalki, A. Iqbal and W.-C. Lai, *Nanomaterials*, 2022, **12**, 3668.
- 7 W. Al-Gethami, D. Alhashmialameer, N. Al-Qasmi, S. H. Ismail and A. H. Sadek, *Nanomaterials*, 2022, **12**, 3620.
- 8 K. L. Routray, S. Saha and D. Behera, *Mater. Chem. Phys.*, 2019, **224**, 29–35.
- 9 K. Kombaiah, J. J. Vijaya, L. J. Kennedy, M. Bououdina and B. Al Najjar, *J. Alloys Compd.*, 2018, **735**, 1536–1545.
- 10 P. Kushwaha and P. Chauhan, *Inorg. Nano-Metal Chem.*, 2021, 1–8.
- 11 D. Gingasu, I. Mindru, D. C. Culita, J. M. Calderon-Moreno, C. Bartha, S. Greculeasa, N. Iacob, S. Preda and O. Oprea, *Appl. Phys. A*, 2021, **127**, 892.
- 12 G. C. Hermosa, C.-S. Liao, H.-S. Wu, S.-F. Wang, T.-Y. Liu, K.-S. Jeng, S.-S. Lin, C.-F. Chang and A.-C. A. Sun, *IEEE Trans. Magn.*, 2022, **58**, 1–7.

- 13 D. Ayu Larasati, D. Lismawenning Puspitarum, M. Yoga Darmawan, N. Imani Istiqomah, J. Partini, H. Aliah and E. Suharyadi, *Results Mater.*, 2023, **19**, 100431.
- 14 D. N. Chandrani, S. Ghosh and A. R. Tanna, *J. Inorg. Organomet. Polym. Mater.*, 2024, In press.
- 15 A. Miri, M. Sarani, A. Najafidoust, M. Mehrabani, F. A. Zadeh and R. S. Varma, *Mater. Res. Bull.*, 2022, **149**, 111706.
- 16 A. Cheraghi, F. Davar, M. Homayoonfal and A. Hojjati-Najafabadi, *Ceram. Int.*, 2021, **47**, 20210–20219.
- 17 K. L. Routray, S. Saha and D. Behera, *J. Electron. Mater.*, 2020, **49**, 7244–7258.
- 18 A. Manikandan, R. Sridhar, S. Arul Antony and S. Ramakrishna, *J. Mol. Struct.*, 2014, **1076**, 188–200.
- 19 S. Punyasamudram, R. P. Puthalapattu, A. Bathinapatla, R. Mulpuri, S. Kanchi and P. V. N. Kumar, *Chemosphere*, 2024, **349**, 140892.
- 20 R. Kavitha, K. Krishna Veni, S. Sagadevan and L. C. Nehru, *Ceram. Int.*, 2024, **50**, 4861–4874.
- 21 O. Baytar, A. Ekinici, Ö. Şahin and A. Akdag, *ChemistrySelect*, 2024, **9**, e202304491.
- 22 R. E. Nimshi, J. J. Vijaya, L. J. Kennedy, P. S. Selvamani, M. Bououdina and P. J. Sophia, *Ceram. Int.*, 2023, **49**, 13762–13773.
- 23 T. T. Thao, K. T. Tam, N. P. Hung, L. H. Nguyen and N. Van Khien, *J. Mater. Res.*, 2024, **39**, 1499–1512.
- 24 Q. Y. Tamboli, S. M. Patange, Y. K. Mohanta, A. D. Patil, R. Ali, I. Bushnak and K. Zakde, *ACS Omega*, 2024, **9**, 3835–3845.
- 25 D. Gingasu, D. C. Culita, J. M. Calderon Moreno, G. Marinescu, C. Bartha, O. Oprea, S. Preda, M. C. Chifiriuc and M. Popa, *Coatings*, 2023, **13**, 1250.

- 26 F. Dehghani, S. Shahmoradi, M. Naghizadeh, T. Firuzyar, A. Vaez, S. R. Kasaei, A. M. Amani and S. Mosleh-Shirazi, *Appl. Phys. A*, 2022, **128**, 250.
- 27 M. A. Ansari, R. Govindasamy, M. Y. Begum, M. Ghazwani, A. Alqahtani, M. N. Alomary, Y. F. Jamous, S. A. Alyahya, S. Asiri, F. A. Khan, M. A. Almessiere and A. Baykal, *Nanotechnol. Rev.*, 2023, **12**, 20230575.
- 28 D. Gingasu, I. Mindru, O. C. Mocioiu, S. Preda, N. Stanica, L. Patron, A. Ianculescu, O. Oprea, S. Nita, I. Paraschiv, M. Popa, C. Saviuc, C. Bleotu and M. C. Chifiriuc, *Mater. Chem. Phys.*, 2016, **182**, 219–230.
- 29 A. Naghizadeh, S. Mohammadi-Aghdam and S. Mortazavi-Derazkola, *Bioorg. Chem.*, 2020, **103**, 104194.
- 30 D. L. Puspitarum, N. I. Istiqomah, R. M. Tumbelaka, A. Kusumaatmaja, D. Oshima, T. Kato and E. Suharyadi, *Adv. Nat. Sci. Nanosci. Nanotechnol.*, 2022, **13**, 045003.
- 31 J. R. P. Oliveira, L. S. Ribas, J. S. Napoli, E. Abreu, J. L. Diaz de Tuesta, H. T. Gomes, A. M. Tusset and G. G. Lenzi, *Magnetochemistry*, 2023, **9**, 200.
- 32 M. Liaskovska, T. Tatarchuk, V. Kotsyubynsky and H. Ersteniuk, *Phys. Chem. Solid State*, 2021, **22**, 792–803.
- 33 H. Tasqeen, M. Waseem, S. Hussain, Zil-E-Humma, A. Baig and A. Majeed, *Chem. Pap.*, 2024, **78**, 4517–4528.
